# Supplementary material
Source: PubMed Central journal article supplement (PMC5308387)
Supplement: ULT684529_supplementary_material.pdf [file ULT684529_supplementary_material.pdf]

**Supplementary Table 1. Results for all configurations showing the thermal indices for each mode and the maximum and final temperature rise measured at the nearest 3 thermocouples.**

| Manufacturer | Scanner            | Probe     | GYN-OB | TI Bmode | TI CF | TI PW | TC <sub>1</sub> (surface) |                        | TC <sub>2</sub> (7 mm) |                        | TC <sub>3</sub> (14 mm) |                        |
|--------------|--------------------|-----------|--------|----------|-------|-------|---------------------------|------------------------|------------------------|------------------------|-------------------------|------------------------|
|              |                    |           |        |          |       |       | dT <sub>end</sub> [°C]    | dT <sub>max</sub> [°C] | dT <sub>end</sub> [°C] | dT <sub>max</sub> [°C] | dT <sub>end</sub> [°C]  | dT <sub>max</sub> [°C] |
| GE           | Logiq E9           | IC5-9D    | GYN    | 0.7      | 0.6   | 0.3   | 1.39                      | 1.65                   | 0.53                   | 0.56                   | 0.18                    | 0.20                   |
| GE           | Logiq E9           | IC5-9D    | OB     | 0.4      | 0.4   | 0.3   | 2.12                      | 2.13                   | 0.83                   | 0.85                   | 0.36                    | 0.37                   |
| GE           | Logiq S8           | IC5-9D    | GYN    | 1.1      | 1.6   | 0.3   | 1.28                      | 1.43                   | 0.53                   | 0.54                   | 0.22                    | 0.22                   |
| GE           | Logiq S8           | IC5-9D    | OB     | 0.7      | 1.6   | 0.3   | 1.42                      | 1.52                   | 0.64                   | 0.65                   | 0.30                    | 0.32                   |
| GE           | Voluson 730        | IC5-9     | GYN    | 0.2      | 0.6   | 1     | 1.52                      | 1.97                   | 0.82                   | 0.90                   | 0.44                    | 0.47                   |
| GE           | Voluson 730        | IC5-9     | OB     | 0.3      | 0.5   | 1     | 1.76                      | 1.98                   | 0.77                   | 0.87                   | 0.34                    | 0.42                   |
| GE           | Voluson 730 Expert | RIC5-9H   | GYN    | 0.1      | 0.3   | 0.8   | 1.16                      | 1.64                   | 0.48                   | 0.58                   | 0.15                    | 0.19                   |
| GE           | Voluson 730 Expert | RIC5-9H   | OB     | 0.2      | 0.3   | 0.2   | 2.17                      | 2.23                   | 1.01                   | 1.02                   | 0.43                    | 0.45                   |
| GE           | Voluson 730 Pro    | RIC5-9W   | GYN    | 0.1      | 0.1   | 0.5   | 0.99                      | 1.03                   | 0.41                   | 0.41                   | 0.17                    | 0.25                   |
| GE           | Voluson 730 Pro    | RIC5-9W   | OB     | 0.1      | 0.2   | 0.5   | 1.27                      | 1.28                   | 0.53                   | 0.53                   | 0.23                    | 0.24                   |
| GE           | Voluson E6         | IC5-9D    | GYN    | 0.1      | 0.2   | 0.1   | 1.13                      | 1.14                   | 0.46                   | 0.47                   | 0.19                    | 0.20                   |
| GE           | Voluson E6         | IC5-9D    | OB     | 0.1      | 0.2   | 0.3   | 1.29                      | 1.30                   | 0.59                   | 0.60                   | 0.30                    | 0.31                   |
| GE           | Voluson E6         | RIC5-9D   | GYN    | 0.1      | 0.2   | 0.2   | 1.47                      | 1.53                   | 0.63                   | 0.64                   | 0.23                    | 0.24                   |
| GE           | Voluson E6         | RIC5-9D   | OB     | 0.1      | 0.2   | 0.1   | 0.76                      | 0.82                   | 0.36                   | 0.37                   | 0.19                    | 0.20                   |
| GE           | Voluson E8         | RIC6-5D   | GYN    | 0.1      | 0.1   | 0.2   | 1.46                      | 1.71                   | 0.66                   | 0.67                   | 0.24                    | 0.25                   |
| GE           | Voluson E8         | RIC6-5D   | OB     | 0.1      | 0.1   | 0.2   | 1.62                      | 1.88                   | 0.82                   | 0.83                   | 0.36                    | 0.37                   |
| GE           | Voluson-E          | IC5-9W-RS | GYN    | 0.1      | 0.1   | 0.2   | 1.72                      | 1.73                   | 0.63                   | 0.64                   | 0.22                    | 0.27                   |
| GE           | Voluson-E          | IC5-9W-RS | OB     | 0.1      | 0.1   | 0.1   | 1.21                      | 1.23                   | 0.51                   | 0.51                   | 0.22                    | 0.24                   |
| Hitachi      | Ascendus           | 10-2      | GYN    | N/A      | N/A   | N/A   | 1.59                      | 1.79                   | 0.64                   | 0.67                   | 0.22                    | 0.23                   |
| Hitachi      | Ascendus           | 10-2      | OB     | N/A      | N/A   | N/A   | 1.32                      | 1.44                   | 0.52                   | 0.55                   | 0.19                    | 0.22                   |
| Philips      | CX50               | C10-3V    | GYN    | 0.3      | 1.5   | 1.7   | 1.25                      | 2.68                   | 0.66                   | 1.09                   | 0.34                    | 0.67                   |
| Philips      | CX50               | C10-3V    | OB     | 0.4      | 1.5   | 1.7   | 1.61                      | 2.84                   | 0.83                   | 1.16                   | 0.40                    | 0.65                   |
| Philips      | Envisor HD         | C8-4V     | GYN    | 0.7      | 0.7   | 0.6   | 2.11                      | 2.60                   | 0.96                   | 1.05                   | 0.42                    | 0.49                   |
| Philips      | Envisor HD         | C8-4V     | OB     | 0.4      | 0.5   | 1.1   | 1.33                      | 1.75                   | 0.62                   | 0.69                   | 0.24                    | 0.30                   |
| Philips      | iU22               | 3D9-3V    | GYN    | 0.1      | 0.3   | 0.3   | 0.51                      | 1.59                   | 0.24                   | 0.38                   | 0.09                    | 0.18                   |
| Philips      | iU22               | 3D9-3V    | OB     | 0.3      | 0.3   | 1.1   | 2.34                      | 3.04                   | 1.19                   | 1.20                   | 0.56                    | 0.57                   |
| Philips      | iU22               | C10-3V    | GYN    | 0.3      | 0.6   | 0.3   | 0.97                      | 1.29                   | 0.50                   | 0.60                   | 0.24                    | 0.30                   |
| Philips      | iU22               | C10-3V    | OB     | 0.4      | 0.6   | 0.2   | 1.54                      | 1.74                   | 0.87                   | 0.88                   | 0.40                    | 0.41                   |

|         |                |            |     |     |     |     |      |      |      |      |      |      |
|---------|----------------|------------|-----|-----|-----|-----|------|------|------|------|------|------|
| Philips | iU22           | C8-4V      | GYN | 0.1 | 0.4 | 0.4 | 1.39 | 2.36 | 0.65 | 0.85 | 0.23 | 0.29 |
| Philips | iU22           | C8-4V      | GYN | 0.1 | 0.4 | 0.4 | 0.61 | 1.52 | 0.32 | 0.50 | 0.13 | 0.18 |
| Philips | iU22           | C8-4V      | OB  | 0.5 | 0.5 | 1.3 | 1.99 | 3.61 | 0.97 | 1.26 | 0.41 | 0.54 |
| Philips | iU22           | C8-4V      | OB  | 0.2 | 0.5 | 1.1 | 2.10 | 3.21 | 1.05 | 1.20 | 0.39 | 0.44 |
| Siemens | Acuson Antares | EC9-4      | GYN | N/A | 0.5 | 1   | 2.86 | 3.21 | 1.14 | 1.18 | 0.41 | 0.47 |
| Siemens | Acuson Antares | EC9-4      | OB  | N/A | 0.5 | 1   | 3.14 | 3.36 | 1.32 | 1.33 | 0.51 | 0.53 |
| Siemens | Acuson S2000   | MC9-4      | GYN | N/A | N/A | 1.8 | 2.65 | 2.96 | 1.11 | 1.19 | 0.41 | 0.52 |
| Siemens | Acuson S2000   | MC9-4      | OB  | 0.3 | 0.4 | 1.8 | 2.47 | 2.80 | 1.17 | 1.24 | 0.49 | 0.54 |
| Toshiba | Aplio 500      | 11C3       | GYN | N/A | 0.5 | 0.5 | 2.21 | 2.29 | 0.91 | 0.95 | 0.39 | 0.41 |
| Toshiba | Aplio 500      | 11C3       | OB  | N/A | 0.4 | 0.4 | 2.82 | 2.86 | 1.30 | 1.30 | 0.63 | 0.63 |
| Toshiba | Aplio 500      | 9C3        | GYN | N/A | N/A | 1.2 | 1.98 | 3.28 | 0.96 | 1.09 | 0.46 | 0.52 |
| Toshiba | Aplio 500      | 9C3        | OB  | N/A | N/A | 1.2 | 2.09 | 3.36 | 0.88 | 1.05 | 0.34 | 0.44 |
| Toshiba | Aplio 500      | 9CV3       | GYN | N/A | N/A | 0.9 | 1.67 | 1.86 | 0.58 | 0.60 | 0.19 | 0.21 |
| Toshiba | Aplio 500      | 9CV3       | OB  | N/A | N/A | 0.9 | 1.78 | 1.92 | 0.87 | 0.87 | 0.36 | 0.37 |
| Toshiba | Aplio 500      | PVT-661 VT | GYN | N/A | N/A | 0.7 | 1.99 | 2.67 | 0.78 | 0.89 | 0.28 | 0.34 |
| Toshiba | Aplio 500      | PVT-661 VT | GYN | N/A | N/A | 0.6 | 1.53 | 2.02 | 0.74 | 0.79 | 0.29 | 0.41 |
| Toshiba | Aplio 500      | PVT-661 VT | OB  | N/A | N/A | 0.6 | 2.27 | 2.60 | 0.96 | 1.00 | 0.38 | 0.41 |
| Toshiba | Aplio 500      | PVT-661 VT | OB  | N/A | N/A | 0.6 | 2.31 | 2.60 | 1.07 | 1.07 | 0.38 | 0.39 |
| Toshiba | Aplio 80       | PVT-661 VT | GYN | N/A | N/A | N/A | 1.21 | 1.58 | 0.57 | 0.62 | 0.21 | 0.22 |
| Toshiba | Aplio 80       | PVT-661 VT | OB  | N/A | N/A | N/A | 1.03 | 1.57 | 0.50 | 0.58 | 0.21 | 0.22 |
| Toshiba | Aplio MX       | PVT-661 VT | GYN | N/A | N/A | N/A | 1.93 | 2.19 | 0.91 | 0.91 | 0.31 | 0.32 |
| Toshiba | Aplio MX       | PVT-661 VT | GYN | N/A | N/A | N/A | 1.98 | 2.32 | 1.05 | 1.08 | 0.38 | 0.38 |
| Toshiba | Aplio MX       | PVT-661 VT | OB  | N/A | N/A | N/A | 1.56 | 1.60 | 0.63 | 0.64 | 0.25 | 0.27 |
| Toshiba | Aplio MX       | PVT-661 VT | OB  | N/A | N/A | 0.5 | 1.91 | 2.44 | 0.99 | 1.10 | 0.32 | 0.33 |
| Toshiba | Aplio XG       | PVT-661 VT | GYN | N/A | N/A | N/A | 1.24 | 1.37 | 0.45 | 0.45 | 0.14 | 0.14 |
| Toshiba | Aplio XG       | PVT-661 VT | GYN | N/A | N/A | N/A | 1.91 | 1.92 | 0.86 | 0.87 | 0.37 | 0.39 |
| Toshiba | Aplio XG       | PVT-661 VT | GYN | N/A | N/A | N/A | 2.45 | 2.45 | 1.17 | 1.18 | 0.50 | 0.50 |
| Toshiba | Aplio XG       | PVT-661 VT | GYN | N/A | N/A | N/A | 2.53 | 2.54 | 1.37 | 1.38 | 0.61 | 0.62 |
| Toshiba | Aplio XG       | PVT-661 VT | OB  | N/A | N/A | N/A | 1.87 | 1.88 | 0.72 | 0.73 | 0.24 | 0.25 |
| Toshiba | Aplio XG       | PVT-661 VT | OB  | N/A | N/A | N/A | 1.89 | 1.89 | 0.82 | 0.83 | 0.31 | 0.31 |
| Toshiba | Aplio XG       | PVT-661 VT | OB  | N/A | N/A | N/A | 2.14 | 2.62 | 0.87 | 0.90 | 0.24 | 0.25 |
| Toshiba | Aplio XG       | PVT-661 VT | OB  | N/A | N/A | N/A | 2.14 | 2.26 | 1.01 | 1.01 | 0.36 | 0.37 |
| Toshiba | Viamo          | PVT-661 VT | GYN | 0.1 | 0.2 | 0.4 | 0.95 | 1.84 | 0.58 | 0.77 | 0.25 | 0.30 |
| Toshiba | Viamo          | PVT-661 VT | OB  | 0.1 | 0.1 | 0.1 | 0.22 | 0.27 | 0.18 | 0.19 | 0.09 | 0.10 |
| Toshiba | Xario          | PVT-661 VT | GYN | N/A | N/A | N/A | 2.69 | 2.71 | 1.24 | 1.25 | 0.48 | 0.50 |
| Toshiba | Xario          | PVT-661 VT | OB  | N/A | N/A | N/A | 1.51 | 1.88 | 0.71 | 0.73 | 0.27 | 0.28 |
